# Supplementary material for: Novel and Transgressive Salinity Tolerance in Recombinant Inbred Lines of Rice Created by Physiological Coupling-Uncoupling and Network Rewiring Effects
Source: Front Plant Sci. 2021 Feb 23;12:615277. doi: 10.3389/fpls.2021.615277 (PMC7940525; doi:10.3389/fpls.2021.615277)
Supplement: Supplementary Dataset 1 — F8-RILs generated from IR29 × Pokkali and their standard evaluation scores (SES) from initial testing at IRRI and subsequent testing at TTU. [file Data_Sheet_1.xlsx]

## Sheet: Sheet1
Supplementary Dataset 1. List of F8-RILs generated from the IR29 X Pokkali cross and their standard evaluation scores (SES) from initial testing in IRRI and subsequent testing in TTU.
Genotype	SES EC = 9 (IRRI)	SES EC = 12 (TTU)
FL301	5	4.5
FL302	5	4
FL303	7	4.5
FL311	7	Not tested
FL313	7	Not tested
FL327	9	5.5
FL328	9	Not tested
FL329	9	Not tested
FL333	9	4.5
FL335	7	Not tested
FL350	9	Not tested
FL351	7	Not tested
FL352	9	5
FL353	9	Not tested
FL354	7	Not tested
FL356	4	7
FL358	5	7
FL359	7	Not tested
FL360	7	Not tested
FL362	7	Not tested
FL370	7	Not tested
FL378	3	2.5
FL382	5	3.5
FL384	7	Not tested
FL387	5	4.5
FL389	5	6
FL390	5	Not tested
FL395	5	6
FL396	4	3.5
FL397	5	4
FL399	5	6
FL404	5	Not tested
FL407	7	2
FL409	5	6
FL412	7	Not tested
FL416	5	2.5
FL418	5	7
FL422	7	Not tested
FL423	7	Not tested
FL428	5	2
FL429	7	Not tested
FL431	7	4.5
FL433	4	4
FL434	5	4.5
FL435	4	5
FL436	7	Not tested
FL439	7	Not tested
FL440	7	Not tested
FL441	5	7
FL442	4	7
FL443	5	7
FL445	5	7
FL446	5	5
FL448	7	4
FL449	5	2.5
FL450	7	Not tested
FL451	7	Not tested
FL452	7	Not tested
FL453	7	Not tested
FL454	5	4.5
FL456	5	7.5
FL460	4	5.5
FL462	9	Not tested
FL463	5	5
FL468	5	7
FL469	7	3.5
FL470	3	Not tested
FL472	4	7
FL473	5	4.5
FL476	5	7
FL478	3	3
FL480	7	Not tested
FL483	5	4.5
FL488	9	Not tested
FL489	7	Not tested
FL490	5	Not tested
FL492	3	Not tested
FL493	7	Not tested
FL494	7	3
FL495	7	Not tested
FL496	4	2
FL497	7	Not tested
FL499	7	9
FL501	4	2
FL502	7	3
FL507	4	7
FL508	4	6
FL510	5	1.5
FL512	4	8
FL513	7	Not tested
FL514	7	Not tested
FL520	9	Not tested
FL521	9	Not tested
FL529	7	Not tested
FL530	7	3
FL537	9	Not tested
FL540	9	Not tested
FL541	5	4
FL542	5	7
FL543	7	Not tested
FL545	7	4
FL546	7	Not tested
FL547	9	Not tested
FL548	9	Not tested
FL550	7	Not tested
FL557	7	3.5
FL558	9	Not tested
FL560	7	2.5
FL561	9	6
FL563	9	Not tested
FL567	5	4
FL568	5	4
FL572	5	6
FL577	5	6
FL578	7	Not tested
FL580	7	Not tested
FL582	5	Not tested
FL586	7	Not tested
FL588	5	6
FL589	7	Not tested
FL590	5	6
FL591	7	Not tested
FL594	9	Not tested
IR29	7	8
IR64	Not tested	3.5/8
Pokkali	3	5
