# Supplementary material for: Novel and Transgressive Salinity Tolerance in Recombinant Inbred Lines of Rice Created by Physiological Coupling-Uncoupling and Network Rewiring Effects
Source: Front Plant Sci. 2021 Feb 23;12:615277. doi: 10.3389/fpls.2021.615277 (PMC7940525; doi:10.3389/fpls.2021.615277)
Supplement: Supplementary Dataset 3 — Gene loci co-expressed with OsCML27 in each genotype. [file Data_Sheet_3.xlsx]

## Sheet: Sheet1
Supplementary Dataset 3. Gene loci co-expressed with OsCML27 in each genotype.
Genotype	ID	Description	Annotated/possible activity
Pokkali	Os10t0557900-00	Peptidase M10A and M12B, matrixin and adamalysin family protein.	extracellular matrix peptidase
Pokkali	Os08t0234000-01	Similar to 60S ribosomal protein L7-2.
Pokkali	Os08t0236700-00	Similar to Exonuclease.
Pokkali	Os10t0478100-02	Heat shock protein DnaJ, N-terminal domain containing protein.	chaperone protein
Pokkali	Os05t0302700-01	Similar to ATP/ADP carrier protein.
Pokkali	Os11t0704700-01	RNA recognition motif domain domain containing protein.
Pokkali	Os03t0171600-02	Kelch-type beta propeller domain containing protein.	OsFBK12, oex leads to delay in leaf senescence, increased seed size, affects ethylene levels for regulation of leaf senescence
Pokkali	Os03t0265200-01	Similar to Josephin-like protein.	protein deubiquitination
Pokkali	Os07t0682700-01	Similar to Chitin-binding lectin 1 precursor (PL-I).
Pokkali	Os07t0167500-01	Conserved hypothetical protein.
Pokkali	Os05t0573000-01	Conserved hypothetical protein.
Pokkali	Os12t0541300-01	NADPH oxidase, Respiratory burst oxidase homolog, Ethylene-induced aerenchyma formation in roots under oxygen-deficient conditions	triggers oxidative burst for signal transduction
Pokkali	Os05t0299500-01	Protein of unknown function DUF914, eukaryotic family protein.
Pokkali	Os04t0609600-01	Similar to Protein phosphatase type 2C.	OsPP2C44, no function yet, members are important for stress tolerance because of signaling
Pokkali	Os02t0534400-01	Cell wall invertase (EC 3.2.1.26).	CIN's get downregulated to help with delayed flowering under stress conditions.
Pokkali	Os03t0326600-01	Nucleotide-binding, alpha-beta plait domain containing protein.	spliceosome component (?)
Pokkali	Os06t0320200-01	Similar to OSIGBa0135C13.7 protein.	beta-glucosidase 24, cellulase, possibly for cell wall plasticity
Pokkali	Os04t0447100-01	Similar to Lipoxygenase.	has roles in JA, disease tolerance
Pokkali	Os09t0444200-01	Lecithin:cholesterol acyltransferase family protein.
Pokkali	Os07t0174400-00	Similar to Non-specific lipid-transfer protein.	normally, expressed in roots. It has roles in cuticular wax/suberin/etc. for defense
Pokkali	Os05t0183100-01	Similar to WRKY transcription factor 16 (Fragment).	positive regulation of disease resistance
Pokkali	Os03t0807700-01	Protein of unknown function DUF642 domain containing protein.
Pokkali	Os03t0320100-01	Alpha-L-arabinofuranosidase, C-terminal domain containing protein.	for cell wall component modification
Pokkali	Os03t0287800-00	Similar to beta3-glucuronyltransferase.	synthesis of glucoronoxylan hemicellulose in secondary cell walls
Pokkali	Os02t0323000-01	Similar to Felis catus multi-drug resistance related (Fragment).	OsABCB10 KO lines are hypersensitive to drought, possibly transports ferulic acid, suggests that this reduces cell wall extensibility, leading to drought-induced growth arrest
Pokkali	Os11t0135400-00	60S acidic ribosomal protein P0.
Pokkali	Os10t0495500-01	Hypothetical conserved gene.
Pokkali	Os10t0415200-02	Exocyst complex subunit Sec15-like family protein.	if it's connected to the other genes here, possibly for transporting things for cell wall construction
Pokkali	Os04t0449500-01	Similar to H0818E04.12 protein.	transmembrane protein
Pokkali	Os09t0135800-02	Armadillo-like helical domain containing protein.
Pokkali	Os07t0497400-01	Transglutaminase-like domain containing protein.	deglycosylates glycoproteins for denaturation, proteasome directed
Pokkali	Os05t0509500-01	Similar to Signal recognition particle 54 kDa protein 2 (SRP54).
Pokkali	Os03t0211500-01	Hypothetical conserved gene.
Pokkali	Os02t0167600-01	Hypothetical gene.	SAUR6 (small auxin up rna6), upregulated with auxin; function is obscured
Pokkali	Os12t0106300-01	Xylan acetyltransferase, Resistance to bacterial leaf blight disease	OsTBL1, for susceptibility to pathogen; may be connected to the cell wall genes in this clade
Pokkali	Os09t0572800-01	Ole e 1 allergen family protein.
Pokkali	Os08t0517700-02	Similar to Oxysterol-binding protein OBPa.	lipid binding, sterol transporter activity (uniprot)
Pokkali	Os03t0572900-01	Multi antimicrobial extrusion protein MatE family protein.	transporter protein, PEZ2, important for iron transport bec it transports phenolics that solubilize iron for uptake
Pokkali	Os03t0405900-01	Hypothetical conserved gene.
Pokkali	Os10t0552400-01	Zinc finger, RING/FYVE/PHD-type domain containing protein.	For protein degradation
Pokkali	Os06t0646100-01	Conserved hypothetical protein.
Pokkali	Os03t0322500-01	Similar to 14 kDa zinc-binding protein (Protein kinase C inhibitor) (PKCI).
Pokkali	Os02t0532300-02	Alpha/beta hydrolase fold-1 domain containing protein.
Pokkali	Os01t0541800-01	MtN3 and saliva related transmembrane protein family protein.	sugar transporter, may be important for nutrition purposes or for cell wall
Pokkali	Os01t0976500-01	KIP1-like domain containing protein.
Pokkali	Os09t0309500-01	Conserved hypothetical protein.
Pokkali	Os07t0673900-01	Hypoxia induced protein, Early stage of hypoxia signalling	OsHIGD2; co-expressed with fermentation genes or genes for respiration without oxygen
Pokkali	Os01t0511100-01	UspA domain containing protein.
Pokkali	Os06t0193400-01	Similar to Helix-loop-helix protein homolog.	OsPTF1, overexpression leads to tolerance to Pi starvation, maybe connected to the nutrient uptake aspect
Pokkali	Os12t0139300-01	Similar to Cytochrome P450 90A1 (EC 1.14.-.-).	part of brassinosteroid synthesis pathway; 6-deoxycathasterone to 6-deoxyteasterone, step after rate-limiting step
Pokkali	Os11t0216000-01	Pyruvate kinase family protein.
Pokkali	Os09t0486500-02	A20/AN1 zinc-finger protein, Response to multiple biotic stresses, Regulation of abiotic stress responses	OSISAP1, overexpression leads to tolerance in cold, dehydration and salt stress in transgenic tobacco; also helps reduce yield losses
Pokkali	Os01t0293000-01	S-adenosyl-l-methionine synthetase, Histone H3K4me3 and DNA methylation, Regulation of gene expression related to flowering	KO of SAMS genes lead to delay in flowering. The long term downregulation here may be connected to that
Pokkali	Os05t0125600-01	Protein of unknown function DUF1677, Oryza sativa family protein.
Pokkali	Os09t0491740-01	Auxin efflux carrier domain containing protein.
Pokkali	Os06t0716800-02	Basic leucine zipper domain containing protein.	rice blast disease suppression; silencing of this leads to cell death
Pokkali	Os05t0471000-01	Similar to Ser-thr protein kinase (Fragment).
Pokkali	Os02t0638650-01	Pathogenesis-related transcriptional factor and ERF domain containing protein.	comes from stress related ERE family
Pokkali	Os01t0268100-01	Similar to Major facilitator superfamily antiporter.	micronutrient transporter (?) maybe for exclusion just as the Fe one above
Pokkali	Os12t0529900-01	Conserved hypothetical protein.
Pokkali	Os10t0542400-02	Expansin/Lol pI family protein.	probably for cell wall modification
Pokkali	Os09t0525700-01	Similar to Generative cell specific-1.	HAPLESS 2B(HAP2B); important for fertilization; mediates fusion of cell membranes - falls in line with the other genes in this group
Pokkali	Os09t0506000-03	Similar to Nucleotide pyrophosphatase/phosphodiesterase.	for phosphorus mobilization, possibly
Pokkali	Os08t0178700-01	Similar to Calmodulin-binding diacylglycerol kinase.	associated with calmodulin signaling; may be associated with CML27
Pokkali	Os01t0178400-01	Similar to Protein phosphatase 2A B'kappa subunit.	associated with signaling; protein dephosphorylation
Pokkali	Os01t0666000-01	Similar to Lipid phosphate phosphatase 2 (EC 3.1.3.-) (AtLPP2) (Phosphatidic acid phosphatase 2) (AtPAP2) (Prenyl diphosphate phosphatase).	similar to PAP (purple acid phosphatase) but not member of the family. Possibly also associated with phosphate remobilization
Pokkali	Os08t0467300-01	Clathrin adaptor, phosphoinositide-binding, GAT-like domain containing protein.	possibly for endocytosis (clathrin)
Pokkali	Os07t0659500-01	Non-SMC condensin subunit, XCAP-D2/Cnd1 family protein.	important for chromatin condensation; may be for chromatin remodeling which affects gene expression
Pokkali	Os03t0187600-01	GRAM domain containing protein.	FIP1 (FH interacting protein); possible for actin reformation and intracellular movement of molecules
Pokkali	Os02t0773400-01	Cyclic nucleotide-binding domain containing protein.	Ca2+ transport (signaling); stress induced; maybe co-expressed with the CML27 here
Pokkali	Os02t0473200-01	Peptidase aspartic, catalytic domain containing protein.	aspartic acid protease; may induce programmed cell death
Pokkali	Os01t0171000-01	BRASSINOSTEROID INSENSITIVE 1-associated receptor kinase 1 precursor (EC 2.7.1.37) (BRI1-associated receptor kinase 1) (Somatic embryogenesis receptor-like kinase 3).	homolog of BAK1, which is important for BR signaling by interacting with BRI by kinase action
Pokkali	Os01t0760600-04	Similar to Aspartate aminotransferase.	Aspartate aminotransferase, cytoplasmic; for C and N metabolism, Krebs cycle
Pokkali	Os12t0499700-00	Similar to Protein kinase domain containing protein.	OsRLCK370; important for signaling
Pokkali	Os08t0538600-01	Stress up-regulated Nod 19 family protein.	also upregulated under several stresses, including biotic
Pokkali	Os07t0673200-01	RING-type E3 ubiquitin-ligase, Maintenance of phosphate homeostasis via degradation of phosphate transporters	important for maintenance of phosphate homeostasis ; regulates uptake by degrading Pi transporters
Pokkali	Os05t0482700-01	Similar to 2,3-bisphosphoglycerate-independent phosphoglycerate mutase (EC 5.4.2.1) (Phosphoglyceromutase) (BPG-independent PGAM) (PGAM-I).	pyruvate to g3p
Pokkali	Os04t0640900-01	Similar to ORW1943Ba0077G13.1 protein.	IIP5; IIP4 which interacts with ILA1 can repress secondary wall synthesis; represses CESAs; fits with the other genes here
Pokkali	Os03t0331700-02	Similar to cDNA clone:002-120-A09, full insert sequence.	CML27
Pokkali	Os03t0133300-01	Similar to F7F22.5.
Pokkali	Os02t0759400-01	Zinc finger, RING/FYVE/PHD-type domain containing protein.	induced by stress and by hormones, particularly, SA, ABA, JA, ET, pathogen; possibly important for signal transduction pathways
Pokkali	Os02t0622100-01	Casein kinase I, Low temperature tolerance, Root development, Hormone sensitivity	involved with hormone signaling; also involved in hybrid breakdown (hbd2); also names OsCKI1
Pokkali	Os01t0159200-01	Similar to Fasciclin-like protein FLA18.	fasciclin-like arabinogalactan protein 8; cell adhesion; possibly for signaling (?)
Pokkali	Os02t0513000-01	Similar to Receptor protein kinase-like protein.	OsRLCK72
IR29	Os01t0228800-01	Conserved hypothetical protein.
IR29	Os01t0635400-01	Similar to mRNA-associated protein mrnp 41 (Rae1 protein homolog).	diverse protein family; protein-protein or protein-dna interactions
IR29	Os01t0700100-01	MtN3 and saliva related transmembrane protein family protein.	SWEET2B, vacuolar glucose transporter
IR29	Os01t0775100-01	Plus-3 domain containing protein.	possible histone modification; involved in transcription
IR29	Os01t0880200-03	Similar to cDNA clone:J013112C08, full insert sequence.	hexosyltransferase; cell wall related
IR29	Os02t0573300-01	Similar to Nucleotide-sugar transporter/ sugar porter.	transmembrane transporter for sugars; possible in Golgi
IR29	Os02t0662700-02	Similar to Scl1 protein (Fragment).	has role in phase transition from vegetative to reproductive
IR29	Os02t0676800-01	Similar to Dehydration responsive element binding protein 1E (DREB1E protein).	downregulated under ethylene response; ERF so probably related to stress signaling
IR29	Os02t0789600-01	Similar to DEM2.	DEM2
IR29	Os03t0134900-01	Similar to Glutathione S-transferase GSTF14 (Fragment).	probably for redox cycling, glutathione recycling
IR29	Os03t0139200-02	Cytochrome c region domain containing protein.
IR29	Os03t0304800-01	Lg106-like family protein.
IR29	Os03t0331700-02	Similar to cDNA clone:002-120-A09, full insert sequence.	CML27; bait gene
IR29	Os03t0376000-01	emp24/gp25L/p24 family protein.
IR29	Os03t0756800-01	Uncharacterised protein family UPF0139 domain containing protein.
IR29	Os03t0770800-01	CSLC9.	cellulose synthase like c9; important for forming non-cellulosic polysaccharides for plant cell wall
IR29	Os03t0795400-00	Hypothetical conserved gene.	OsOxi1, interacts with OsPti1a for basal disease resistance
IR29	Os04t0488700-01	Similar to PHY3.
IR29	Os04t0508300-01	Glutaredoxin.	antioxidant activity
IR29	Os04t0516600-01	Pyridoxal phosphate-dependent transferase, major region, subdomain 1 domain containing protein.
IR29	Os04t0537100-01	Similar to Auxin-induced protein X15.	OsSAUR19
IR29	Os04t0550500-05	Similar to N-acetyl glutamate kinase 2.	OsNAGK1; NAGK in maize improves drought tolerance in tobacco
IR29	Os04t0569300-02	Similar to Membrane protein.	Rhomboid protease; may be involved in signaling
IR29	Os04t0569900-01	IQ calmodulin-binding region domain containing protein.	involved in signaling; in arabidopsis overexpression leads to increased resistance
IR29	Os04t0578400-01	Similar to Beta-ring hydroxylase (Fragment).	possibly for cytokinin metabolism
IR29	Os04t0602800-01	Similar to Yarrowia lipolytica chromosome D of strain CLIB99 of Yarrowia lipolytica.
IR29	Os04t0665600-01	HTH_MYB-like transcription factor, Positive regulation of leaf inclination	RLI1, regulates leaf inclination with brassinosteroid
IR29	Os05t0127200-02	Similar to Phospholipase C (Fragment).	OsPLC4; overexpression improves rice survival rate under high salinity and water deficiency
IR29	Os05t0162600-01	Similar to Splicing factor RSZ33.
IR29	Os05t0344400-01	Uncharacterised protein family UPF0497, trans-membrane plant domain containing protein.
IR29	Os06t0158600-01	Protein of unknown function DUF652 family protein.
IR29	Os06t0554300-01	Conserved hypothetical protein.
IR29	Os06t0653800-01	Similar to WD-repeat protein 57 (Prp8-binding protein) (hPRP8BP) (U5 snRNP- specific 40 kDa protein) (38 kDa splicing factor).	OsWD40-133
IR29	Os06t0701200-01	UTP--glucose-1-phosphate uridylyltransferase family protein.
IR29	Os07t0559700-00	Similar to Monosaccharide transporter 3.	OsMST6; upregulated by salt stress and sugars; may be for remobilization
IR29	Os07t0686600-01	VQ domain containing protein.	VQ proteins interact with WRKY; induced with disease infection
IR29	Os08t0269600-01	EGF-like region domain containing protein.
IR29	Os08t0292000-02	Hypothetical conserved gene.	OsTF1L; HD-ZIP TF; promotes lignin biosnyhtesis and stomatal closure for drought
IR29	Os09t0253000-01	Similar to NOI protein.
IR29	Os10t0551700-01	Plant lipid transfer protein and hydrophobic protein, helical domain containing protein.
IR29	Os10t0553800-01	Flavin-containing monooxygenase FMO family protein.
IR29	Os10t0561800-01	Similar to homeodomain leucine zipper protein hox1.	OsHOX1; cell fate commitment
IR29	Os10t0571600-01	No apical meristem (NAM) protein domain containing protein.	ONAC121
IR29	Os11t0183800-00	Similar to Armadillo/beta-catenin-like repeat family protein, expressed.	CSIL2; important for cell wall again
IR29	Os11t0384789-02	Similar to Hydrolase.
IR29	Os11t0527000-01	Conserved hypothetical protein.
IR29	Os11t0570000-01	Similar to Receptor kinase-like protein.
IR29	Os12t0238900-01	Similar to HGA6.	glycosyltransferase
IR29	Os12t0566400-01	Magnesium transporter domain containing protein.	membrane bound transporter
FL510	Os01t0178500-02	A member of rice Aux/IAA family, Cross-talk of auxin and brassinosteroid signaling pathways, Plant morphogenesis	induced by auxin; OsIAA1;
FL510	Os01t0239000-02	Similar to Phosphate starvation regulator protein (Regulatory protein of P- starvation acclimation response Psr1).
FL510	Os01t0532600-00	Similar to HKT1 (High-affinity potassium uptake transporter).	OsHKT3; sodium and potassium transport
FL510	Os01t0689900-03	Hypothetical conserved gene.	OsWAK10a; signaling, receptor protein
FL510	Os01t0723400-05	NADP-malic enzyme, Splicing variant	NADP-ME2; malic acid; upregualted by stress and confers tolerance
FL510	Os01t0750100-03	Transcriptional repressor, Regulation of abiotic and biotic stress signaling pathway	WRKY13; resistance to pathogens; SA- and JA-dependent signaling
FL510	Os01t0817100-01	TRAM, LAG1 and CLN8 homology domain containing protein.	this domain is probably for signaling
FL510	Os01t0888600-01	Similar to Seven transmembrane protein Mlo5 (Fragment).	OsMLO2; upregulated in heat stress; originally for mildew resistance; may be connected to JA- or SA- again?
FL510	Os01t0959800-01	Similar to PSD2 (phosphatidylserine decarboxylase 2); phosphatidylserine decarboxylase.	PSD2; for interorganellar trafficking of phosphatidylserine which is a signaling molecule
FL510	Os02t0115700-01	Catalase isozyme A (EC 1.11.1.6) (CAT-A).	for h202 control; inhibited by ABA
FL510	Os02t0212300-00	Conserved hypothetical protein.
FL510	Os02t0313400-01	Apoptosis inhibitory 5 family protein.	OsAPI5; developmental protein; for tapetum degeneration (PCD)
FL510	Os02t0609400-02	Similar to Iron-stress related protein.
FL510	Os02t0741200-01	Similar to Peroxidase 65 precursor (EC 1.11.1.7) (Atperox P65) (ATP43).	for ros scavenging
FL510	Os02t0789100-01	Similar to predicted protein.	OsCNGC10; related to stress signaling
FL510	Os03t0123800-01	Similar to Hydrolase.
FL510	Os03t0132300-01	TB2/DP1 and HVA22 related protein family protein.	similar to HVA22 , which inhibits GA mediated PCD in aleurone cells
FL510	Os03t0132800-01	Similar to protein kinase-like protein [Oryza sativa (japonica cultivar-group)].	OsBSK1-2; positive regulator of plant immunity, but not involved with BR signaling
FL510	Os03t0160200-02	Conserved hypothetical protein.
FL510	Os03t0214400-01	Similar to Digalactosyldiacylglycerol synthase 2.	chloroplastic protein; galactolipid biosynthesis;
FL510	Os03t0227800-03	Similar to cDNA clone:001-042-G02, full insert sequence.
FL510	Os03t0280400-01	Similar to plant-specific domain TIGR01589 family protein.
FL510	Os03t0297000-02	Protein of unknown function DUF538 family protein.
FL510	Os03t0331700-02	Similar to cDNA clone:002-120-A09, full insert sequence.	cml27
FL510	Os03t0352400-01	Similar to Nucleolar GTP-binding protein 2 (Autoantigen NGP-1).	OsNug2; important for ribosomal unit assembly
FL510	Os03t0356400-01	Thioredoxin fold domain containing protein.	OsGRL6; possibly for ROS scavenging
FL510	Os03t0388500-01	Similar to Anther ethylene-upregulated protein ER1 (Fragment).	similar to OsCBT; transcription factor
FL510	Os03t0402800-01	Tify domain containing protein.	OsTIFY10a; repressor of JA responses; important for defense responses
FL510	Os03t0617500-02	Similar to Cyclin-D5-1.	CYCD5-1; cell division; positive regulation of cell cycle
FL510	Os04t0452000-01	Similar to H0815C01.7 protein.	OsPP2C41; probably important for signaling
FL510	Os04t0495300-01	Similar to OSIGBa0159F11.7 protein.
FL510	Os04t0496800-01	LETM1-like domain containing protein.	similar to letm1. this protein is for respiratory processes in the mitochondrion; possible maintenance of mitochondrion integrity
FL510	Os04t0548300-01	Armadillo-type fold domain containing protein.	snoRNA binding
FL510	Os04t0610400-01	APETALA-2-like transcription Factor, Control of the abscisic acid (ABA)/gibberellin (GA) balance	OsERF77; controls ABA-GA interaction by regulating EUI and NCED; increases production of ABA; negative regulator of drought tolerance and ethylene synthesis
FL510	Os04t0655600-01	Similar to OSIGBa0147J19.13 protein.	nuclear membrane organization (uniprot)
FL510	Os04t0667700-01	Similar to Actin-related protein 8A.	OsARP8; localized to the nucleolus in interphase cells
FL510	Os04t0669300-01	EF hand domain containing protein.	possible part of the Exosome (based on kegg)
FL510	Os05t0210100-01	Lipase, GDSL domain containing protein.	OsGELP64, not characterized yet
FL510	Os05t0332600-01	Xanthine/uracil/vitamin C permease family protein.	adenine/guanine transmembrane transporter activity
FL510	Os05t0444200-01	Similar to T6J4.5 protein (WIP6 protein).	C2H2 TF; uncharacterized; ZOS5-08
FL510	Os05t0481400-01	Transcriptional factor B3 family protein.
FL510	Os05t0531000-01	Protein of unknown function DUF584 family protein.	OsS40-14; associated with senescence; senescence marker; has cis-elements for WRKY
FL510	Os05t0562400-01	DDT domain containing protein.	TF; uncharacterized
FL510	Os06t0125200-01	Protein of unknown function DUF581 family protein.
FL510	Os06t0203600-01	Chalcone isomerase domain containing protein.	OsCHI2; part of biosynthesis pathway for flavonoids
FL510	Os06t0207700-01	A member of the cyclic nucleotide gated channel family, Maternal sporophytic factor, Mediation of Ca2+ inward current, Promotion of pollen tube growth and seed-setting	OsCNGC13; cytoplasmic Ca2+ accumulation; may have role in signaling
FL510	Os06t0297800-01	Similar to protein binding / zinc ion binding.
FL510	Os06t0316800-01	Similar to Glycine-rich protein (Fragment).
FL510	Os06t0329900-01	SAM dependent carboxyl methyltransferase family protein.	jasmonate O-methyltransferase; methyl jasmonate synthesis
FL510	Os06t0608800-04	Zinc finger, RING/FYVE/PHD-type domain containing protein.	putative copine-I; important for membrane trafficking
FL510	Os07t0446100-01	Zinc finger, RING/FYVE/PHD-type domain containing protein.	XBOS34; protein ubiquitination;
FL510	Os07t0513600-00	Hypothetical conserved gene.	possible chaperone binding protein
FL510	Os07t0537000-01	Similar to Receptor protein kinase.	possible membrane bound kinase
FL510	Os07t0608400-01	Similar to nucleic acid binding protein [Oryza sativa (japonica cultivar-group)].	PHD finger protein ALFIN-LIKE 9; recognizes histones (H3K4me3) for transcription
FL510	Os07t0661500-00	Hypothetical conserved gene.
FL510	Os08t0225400-01	Similar to OSIGBa0113I13.9 protein.	possible membrane bound acetylglucosaminyltransferase (glycotransferase for protein modification)
FL510	Os09t0556200-00	Similar to predicted protein.
FL510	Os10t0113900-02	Similar to NADPH-dependent codeinone reductase (EC 1.1.1.247).	NADH-dependent oxidoreductase 2; possible for creation of cholesterols
FL510	Os10t0114300-01	Similar to NADPH-dependent codeinone reductase (EC 1.1.1.247).	NADH-dependent oxidoreductase 2
FL510	Os11t0249900-01	Protein kinase-like domain containing protein.	membrane bound kinase
FL510	Os11t0470500-00	Similar to Protein kinase domain containing protein, expressed.	membrane bound kinase; possibly located in plasmodesma for cellular communication
FL499	Os05t0134200-01	Similar to Protein phosphatase-2C.	OsPP2C47; possibly involved in signaling cascade
FL499	Os10t0532000-01	Similar to GRAB2 protein.	OsNAC18/OsSWN4; involved in secondary cell wall formation to deposit cell wall components outside the cell
FL499	Os04t0505700-01	Leucine-rich repeat, cysteine-containing subtype containing protein.	OsFbox227; protein ubiquitination; tags proteins for proteasome recognition
FL499	Os03t0731050-00	Similar to OSIGBa0138E08-OSIGBa0161L23.2 protein.	acetylglucosaminyltransferase; possibly involved in protein modification
FL499	Os08t0513000-01	Similar to Serine/threonine protein phosphatase.	OsPP103; possibly involved in protein signaling pathway
FL499	Os08t0440500-01	MIR domain containing protein.	MIR domain may have a ligand transferase function, meaning it may be in signaling pathway
FL499	Os07t0568300-02	Similar to ZF protein (Fragment).	OsTZF6/OsC3h50; close members such as TZF1 and TZF8 are involved in stress tolerance
FL499	Os06t0643600-01	DNA glycosylase/AP lyase domain containing protein.	MutM; DNA repair enzyme for damaged DNA
FL499	Os11t0444700-01	Octicosapeptide/Phox/Bem1p domain containing protein.	OsPB1; PB1 domain is for protein binding
FL499	Os10t0521400-01	Alpha/beta hydrolase fold-1 domain containing protein.
FL499	Os08t0266200-01	Similar to T24D18.25 protein.	membrane bound protein
FL499	Os02t0171100-01	Similar to Glyceraldehyde-3-phosphate dehydrogenase (EC 1.2.1.12) (GAPDH).	part of glycolytic pathway
FL499	Os03t0356652-01	Zinc finger, C2H2-like domain containing protein.	Possible TRAF-type domain zn finger, might be acting as signal receptor
FL499	Os02t0161800-01	Similar to Peroxidase precursor (EC 1.11.1.7).	ROS scavenging and detox
FL499	Os06t0164500-00	Conserved hypothetical protein.
FL499	Os05t0543400-02	Similar to Farnesyl diphosphate synthase (Fragment).	OsFPPS2; involved in terpene, terpenoid, or sterol synthesis
FL499	Os04t0669300-01	EF hand domain containing protein.	calcium ion binding; may be involved in signal transduction pathway
FL499	Os04t0602400-01	Similar to Maltose excess protein 1, chloroplast precursor (Root cap protein 1).	OsMT1/OsMEX1; plastidic maltose transporter
FL499	Os02t0133800-01	Proteasome subunit alpha type 1 (EC 3.4.25.1) (20S proteasome alpha subunit F) (20S proteasome subunit alpha-6) (Proteasome component C2).	PAF1; involved in ubiquitin mediated protein degradation
FL499	Os02t0630100-00	ABC-2 type transporter domain containing protein.
FL499	Os06t0716000-01	Protein of unknown function DUF668 family protein.	contains possible kinase domain, or receptor domain; may be involved in signaling
FL499	Os03t0366800-00	Similar to Heat stress transcription factor B-4d.	OsHSFB4D; TF upregulated in response to heat stress
FL499	Os09t0482800-01	EF hand domain containing protein.	calcium ion binding; may be involved in signal transduction pathway
FL499	Os09t0394600-01	Endonuclease/exonuclease/phosphatase domain containing protein.	inositol 1,4,5-trisphosphate 5-phosphatase-like protein; may be part of signal transduction pathway
FL499	Os06t0213200-01	Similar to Tic22.	may be involved in chloroplast protein import
FL499	Os05t0176600-01	Conserved hypothetical protein.	possible localization in mt or chloroplast, in their membranes
FL499	Os03t0374400-01	SNARE associated Golgi protein domain containing protein.	involved in vesicle trafficking
FL499	Os03t0323900-01	Bifunctional inhibitor/plant lipid transfer protein/seed storage domain containing protein.	OsLTPG4; LTPG proteins are involved in accumulation of extracellular waxy substances such as in cuticles or like suberin
FL499	Os03t0263900-01	EF-HAND 2 domain containing protein.	calcium ion binding; may be involved in signal transduction pathway
FL499	Os02t0753300-01	Lipoxygenase, LH2 domain containing protein.	may be involved in signaling through processing of lipids (may be sterols?)\
FL499	Os01t0878700-03	Amino acid transporter, transmembrane domain containing protein.	OsAAP6; amino acid transporter; regulates protein content in grains
FL499	Os02t0669366-00	Hypothetical gene.
FL499	Os10t0520600-02	Similar to fas-associated factor 1-like protein.	has ubx domain found in ubiquitin; FAF-1 domain has been associated with apoptosis
FL499	Os07t0459200-02	Similar to ubiquinone biosynthesis protein ubiB.	first step in ubiquinone biosynthesis
FL499	Os03t0774200-02	Similar to NADH-ubiquinone oxidoreductase subunit 8 (EC 1.6.5.3).	involved in electron transport chain
FL499	Os02t0823300-01	Similar to Neuralized protein.	OsRFP; ring finger protein; possible ubq-ligase protein
FL499	Os01t0847600-01	Aldo-keto reductase, Detoxification of abiotic stress-related reactive aldehydes, Oxidative and heat stress tolerance, Herbicide resistance	possible aldehyde dehydrogenase; important for detoxing or processing alcohol products
FL499	Os03t0708800-03	Hypothetical conserved gene.	uncharacterized TF; simialr to GEBP, which are TFs known for cytokinin response regulation
FL499	Os02t0620100-02	Mis12 family protein.	may be involved in kinetochore assembly; important for mitosis
FL499	Os11t0121400-01	Similar to Protein kinase APK1A, chloroplast precursor (EC 2.7.1.-).	OsRLCK309; involved in signaling cascade
FL499	Os09t0504400-01	Transcription regulator cyclin domain containing protein.	Cyclin-C1-1; kinase involved in regulation of cell cycle via activation of gene transcription
FL499	Os09t0466300-01	Similar to FIP1.	FIP1 is a protein for pre-mrna poly adenylation
FL499	Os08t0518100-01	RabGAP/TBC domain containing protein.	MAP (microtubule-associated protein); Rab GTPase activator activity, involved in protein transport; possible involvement in signaling
FL499	Os05t0514300-02	Similar to Tubby-like protein 3.	TULP9; involved in 'localizing proteins to cilium'; may be for extracellular protein transferrance?; TULP9 in Arabidopsis is involved in protein ubiquitination and degradation
FL499	Os01t0757600-00	Similar to Myosin heavy chain-like protein (Fragment).	cytoskeletal (?)
FL499	Os01t0973600-02	Protein of unknown function DUF506, plant family protein.
FL499	Os12t0285600-01	Pleckstrin homology-type domain containing protein.	oxysterol-binding protein; possibly binds lipids or sterol for transport
FL499	Os11t0487700-00	Conserved hypothetical protein.
FL499	Os09t0133000-01	SWIB/MDM2 domain containing protein.	possible uncharacterized transcription factor based on domain
FL499	Os06t0229300-01	Similar to Hox2b protein.	HAZ1/HOX1A; transcriptional repressor that inhibits HD16/EL1, a negative regulator of GA signaling; positive regulator of GA signaling
FL499	Os03t0821300-01	Similar to TA11 protein (Fragment).	XB15; protein phosphatase that interacts with XA21 as part of its signaling pathway; negatively regulates cell death and xa21 mediated innate immunity
FL499	Os01t0727900-01	Conserved hypothetical protein.
FL499	Os03t0804300-02	Zinc finger, DHHC-type domain containing protein.	s-acyltransferase; possible involvement with transporting proteins to the membrane, via palmitoylation
FL499	Os06t0153800-01	Beta 5 subunit of 20S proteasome.	proteasome subunit for degrading proteins
FL499	Os01t0530400-03	Thioredoxin fold domain containing protein.	GRXS4; monothiol glutaredoxin-s4, mitochondrial; cell redox homeostasis
FL499	Os01t0831900-02	Similar to Ammonium transporter.	OsAMT2;3; ammonium transporter into the cell;
FL499	Os12t0115700-01	Chalcone isomerase domain containing protein.	chalcone flavonone isomerase; part of flavonoid biosynthesis
FL499	Os09t0401000-01	Myb factor.	OsMYB10; uncharacterized TF, possible involvement with circadian rhythm involved transcription
FL499	Os08t0254300-00	Similar to OSIGBa0112M24.2 protein.	membrane bound protein
FL499	Os05t0495600-00	Similar to autoinhibited calcium ATPase.	OsACA7/OsPM5ATP4; calcium-transporting atpase activity; plasma membrane
FL499	Os04t0663700-01	Similar to OSIGBa0099L20.7 protein.
FL499	Os04t0508200-01	Isocitrate/isopropylmalate dehydrogenase domain containing protein.	isocitrate dehydrogenase; one of the irreversible steps of the TCA cycle
FL499	Os01t0338000-02	Similar to GTP-binding protein SAR1A.	OsARL1e; arf-like protein; GTPase activity, invovled in vesicular transport from golgi
FL499	Os01t0899000-01	Similar to Pti1 kinase-like protein.	OsRLCK52; protein phosphorylation, involved in the signal transduction pathway as a kinase receptor protein
FL499	Os08t0472000-01	bZIP transcription factor, Abscisic acid (ABA)-regulated transcription	TRAB1/OsbZIP66/OsABF5; ABA-induced transcription factor; binds to EMP1 and RAB16A which are genes involved in increasing stress tolerance
FL499	Os07t0170100-02	Similar to Branched chain alpha-keto acid dehydrogenase E1 beta subunit.	possibly involved in TCA cycle or for regulating branched chain amino acids, which are involved in reducing oxidative stress
FL499	Os06t0701400-01	Similar to 60S acidic ribosomal protein P3 (P1/P2-like) (P3A).	part of ribosome; for translational elongation
FL499	Os04t0117200-01	Spectrin repeat containing protein.	spectrin repeats are observed to be in proteins involved in cytoskeletal structures
FL499	Os03t0299200-01	Similar to Alcohol dehydrogenase (Fragment).	possible involvement in estrogen biosynthesis
FL499	Os02t0827200-01	Similar to Sucrose transporter.	OsSUT4; sucrose:proton symporter activity
FL499	Os02t0726700-01	Helix-loop-helix DNA-binding domain containing protein.	OsbHLH34; uncharacterized TF
FL499	Os01t0329800-01	YT521-B-like protein family protein.	IAI1; membrane protein involved in interactions between rice cells and Pseudomonas avenae
FL499	Os01t0885700-01	Protein kinase-like domain containing protein.	membrane bound kinase, involved in signaling, involved in pollen recognition
FL499	Os10t0551600-01	Conserved hypothetical protein.	possible part of mitochondrial respiratory chain complex I
FL499	Os08t0156000-01	Conserved hypothetical protein.
FL499	Os04t0465100-01	Haem peroxidase, plant/fungal/bacterial family protein.	prx55; detoxification of peroxides
FL499	Os03t0331700-02	Similar to cDNA clone:002-120-A09, full insert sequence.	cml27
FL499	Os03t0137800-01	Cyclin-dependent kinase inhibitor family protein.	OsiICK5/ICK5/KRP5; Kip-related protein 5; cyclin-dependent kinase inhibitor 5; involved in cell cycle arrest
FL499	Os11t0588300-02	Similar to Glutathione transferase AtGST 10 (EC 2.5.1.18).	OsGSTT1; generation of glutathione for detoxification
FL499	Os09t0113000-01	Conserved hypothetical protein.
FL499	Os06t0154500-01	Mitogen-activated protein kinase, Brassinosteroid (BR) signaling and homeostasis, Regulation of grain size and plant height	OsMAPK6/OsMPK1/OsSIPK; involved in signaling pathway for many stresses; known as a master switch for stress responses
FL499	Os04t0682000-01	Similar to Autophagy 4a.	OsATG4b; cysteine protease required for autophagy; also involved in protein transport
FL499	Os03t0345200-01	40S ribosomal protein S21.	rps21; structural component of the ribosome
FL499	Os02t0591600-01	WD40 repeat domain containing protein.	OsWD40-46
FL499	Os02t0541700-01	Similar to Ubiquinol-cytochrome c reductase complex 7.8 kDa protein (EC 1.10.2.2) (Mitochondrial hinge protein) (CR7).	cytochrome b-c1 complex subunit 6; part of electron transport chain in mitochondria
FL499	Os01t0664500-03	Lg106-like family protein.
FL499	Os01t0264700-01	Cellular retinaldehyde binding/alpha-tocopherol transport family protein.	possibly phosphotidylinositol transporter
FL499	Os01t0304000-01	Similar to Ribosomal protein L29.	ribosomal component
FL499	Os11t0113300-01	Conserved hypothetical protein.
FL499	Os06t0502900-02	Similar to DGCR14 protein.	DCGR14 in humas is involved in spliceosomes for correct RNA processing
FL499	Os04t0547900-01	Anti-sense to fibroblast growth factor protein GFG family protein.
FL499	Os03t0857301-00	Hypothetical protein.
FL499	Os03t0255900-01	Conserved hypothetical protein.	integral component of the membrane
FL499	Os02t0655600-02	Similar to predicted protein.
FL499	Os01t0183300-01	Endonuclease/exonuclease/phosphatase domain containing protein.	phosphatidylinositol-3,4,5-trisphosphate 5-phosphatase activity
FL499	Os02t0232100-01	Zinc finger, RING/FYVE/PHD-type domain containing protein.	HEI10; ubiquitin e3 ligase; seen to be important for crossing over formation during meiosis (pachynema)
FL478	Os11t0540000-00	Hypothetical protein.
FL478	Os05t0345100-00	Similar to patellin-5.	may be involved in membrane trafficking events associated with cell plate formation during cytokinesis
FL478	Os07t0222800-02	Acyl carrier protein-like protein.	for fatty acid biosynthesis and extension
FL478	Os10t0436850-00	EMSY N-terminal domain containing protein.	possible localization in nucleus, for defense to fungus
FL478	Os10t0425400-01	BTB/POZ-like domain containing protein.	OsSTA244; possible TF uncharacterized
FL478	Os12t0636000-01	Zinc finger, RING/FYVE/PHD-type domain containing protein.	OsRDCP5; ubiquitin protein ligase; oex of RDCP1 increased tolerance to drought stress
FL478	Os03t0570300-01	Zinc finger, C2H2-like domain containing protein.	KIN17-like; in response to DNA damage, which indicates it's for repair
FL478	Os09t0112400-01	Similar to DCL protein, chloroplast precursor (Defective chloroplasts and leaves protein).	putative DCL; chloroplast organization
FL478	Os08t0513000-01	Similar to Serine/threonine protein phosphatase.	OsPP103/STPK7; uncharacterized
FL478	Os05t0230600-01	DUF1620-containing and WD40-like repeat protein, Scaffold protein for assembly of the restoration of fertility complex	OsRFC3; transported to mitochondria as membrane protein; possible mediation of stress (?)
FL478	Os04t0624000-01	Similar to Symbiosis-related like protein.	OsATG8B; involved in autophagosome formation; ubq-like modifier that may mediate delivery of autophagosome to vacuole
FL478	Os03t0210600-01	Conserved hypothetical protein.	based from domains, involved in regulation of ABA synthesis and response to heat
FL478	Os12t0574700-00	Similar to lectin-like receptor kinase 7.	receptor protein; response to bacteria or oomycete infection
FL478	Os10t0406600-01	Complex 1 LYR protein family protein.	involved in ETC. possible NADH dehydrogenase or mt complex I
FL478	Os06t0349800-01	Conserved hypothetical protein.
FL478	Os02t0823000-01	Peptidase A22B, signal peptide peptidase domain containing protein.	for signal peptide processing, cleaves type II peptides; SPPL4
FL478	Os11t0157400-01	Exo70 exocyst complex subunit family protein.	Exo70A3; exocytsis protein; similar protein exo70a1 disruption affects mineral nutrient assimilation
FL478	Os07t0107300-01	Plant disease resistance response protein family protein.	Dirigent protein; for biosynthesis of lignans, alkaloids, flavonolignans
FL478	Os04t0431800-01	Conserved hypothetical protein.
FL478	Os03t0413400-01	Glycosyl transferase, family 8 protein.	hexosyl transferase; involved in pectin biosynthesis, so possibly also for cell wall
FL478	Os10t0204100-01	Zinc finger, RING/FYVE/PHD-type domain containing protein.	probable e3 ubq ligase LOG2
FL478	Os09t0558900-01	Similar to NADPH-cytochrome P450 reductase (Fragment).	for heme formation (?); upregulated under SA, drought, water treatment; not too induced by NaCl and ABA
FL478	Os08t0151000-00	Similar to Myb-like DNA-binding domain, SHAQKYF class family protein.	TF, but not characterized yet
FL478	Os07t0483400-01	Protein of unknown function DUF2365 domain containing protein.
FL478	Os05t0301700-01	Similar to Cytochrome c1 (Fragment).	mitochondrial protein, possibly included in etc
FL478	Os02t0455400-00	Hypothetical conserved gene.
FL478	Os02t0797200-01	Similar to 60S ribosomal protein L39.	structural component of ribosome
FL478	Os10t0162834-01	Thioredoxin-like fold domain containing protein.	for ros scavenging
FL478	Os08t0282000-01	Tetraspanin domain containing protein.	membrane bound; senescence-associated-protein like
FL478	Os05t0413400-02	Similar to Isopentenyl diphosphate isomerase 1.	part of secondary metabolite synthesis pathways; mevalonate pathway ad MEP pathway; isoprenoid synthesis
FL478	Os03t0826600-01	Similar to Phospholipase (Fragment).	OsNPC1; known function is to affect silicon distribution to reinforce mechanical strength in rice, also lowers cellulose and hemicellulose content in stems of oex plants
FL478	Os02t0553500-00	Tetratricopeptide-like helical domain containing protein.
FL478	Os06t0210500-01	Similar to Mitochondrial phosphate transporter.	OsPT18; phosphate ion transmembrane transport; maybe supplies Pi's for atp production?
FL478	Os02t0757700-01	Cyclin-like F-box domain containing protein.	OsFBOX110; Os_F0551; protein ubiquitination; proteasomal degradation of proteins
FL478	Os07t0438300-01	Similar to OSIGBa0153E02-OSIGBa0093I20.19 protein.
FL478	Os04t0593500-00	Similar to OSIGBa0142I02-OSIGBa0101B20.21 protein.	ABA binding; sginal receptor; protein phosphatase inhibition/ regulation of stpk activity
FL478	Os04t0547900-01	Anti-sense to fibroblast growth factor protein GFG family protein.	NUDIX hydrolase domain containing protein
FL478	Os03t0138400-01	Conserved hypothetical protein.	response to light intensity (uniprot)
FL478	Os01t0919500-01	Zinc finger, RING/FYVE/PHD-type domain containing protein.
FL478	Os05t0489700-01	bZIP transcription factor, Modulation of the floral transition, Floral repressor	OsHBF1; reduces Hd3a and RFT1 expression to delay flowering with HBF2
FL478	Os11t0133600-01	Similar to Heterogeneous nuclear ribonucleoprotein H3 (hnRNP H3) (hnRNP 2H9). Splice isoform 6.	may be part of ribosome formation?
FL478	Os10t0377400-02	Similar to Ras-related protein Rab11D.	OsRab11E1; Rab proteins are known to be involved in signaling; Rab11 was shown to be required for JA signaling
FL478	Os10t0180000-01	NpGUT1 homolog.	OsGUT1; glucoronosyltransferase GUT1; for hemicellulose construction (glucoronoxylan) in secondary cell walls
FL478	Os05t0180300-01	Leucine-rich repeat, plant specific containing protein.	possible LRR kinase or receptor for signaling
FL478	Os04t0501800-00	Protein of unknown function DUF1068 family protein.
FL478	Os03t0259300-01	Homologue of yeast Hrd3/mammalian SEL1L, ER-resident type I membrane protein, Polyubiquitination of unfolded proteins, Quality control of endoplasmic reticulum-derived protein bodies in rice endosperm	OsHrd3; important for protein quality control; degrades misfolded proteins; suppression of this gene led to unfolded protein responses; stress response (?); leads to ceasing of growth; eventually leads to apoptosis
FL478	Os02t0666800-01	Protein of unknown function DUF788 family protein.	related to vacuolar protein processing
FL478	Os01t0664500-03	Lg106-like family protein.
FL478	Os02t0122000-01	Similar to P18.	histone deacetylase complex subunit (SAP18); transcriptional repressor by compacting chromatin (?); involved in tethering SIN3 complex to core histone proteins
FL478	Os11t0203400-01	Hypothetical conserved gene.
FL478	Os02t0127900-01	Conserved hypothetical protein.
FL478	Os12t0233600-01	Conserved hypothetical protein.
FL478	Os11t0131100-00	VQ domain containing protein.	OsVQ37; Ca2+ binding protien that has VQ domain known to work with WRKY genes
FL478	Os08t0434000-01	Pentatricopeptide repeat domain containing protein.	possible zinc ion bunding protein for RNA modification (uniprot)
FL478	Os08t0409500-01	VQ domain containing protein.	OsVQ33; possibly same as above VQ protein
FL478	Os07t0446900-00	Similar to OSIGBa0102I15.5 protein.
FL478	Os05t0440100-02	Similar to (RAP Annotation release2) Histone deacetylase superfamily protein.	maybe involved with the histone deacetylase protein above
FL478	Os04t0182800-01	Similar to Electron transfer flavoprotein beta-subunit-like.	ETFB; involved in the mitochondrial ETC; produces FADH
FL478	Os03t0421400-02	Similar to band 7 family protein.	involved in ubiquitin mediated proteolysis and ER quality check
FL478	Os03t0259900-01	Protein of unknown function DUF593 family protein.	possible myosin binding protein
FL478	Os01t0572700-01	Conserved hypothetical protein.	possible membrane protein
FL478	Os02t0810100-00	Ankyrin repeat containing protein.	plasma membrane protein
FL478	Os08t0461600-00	Zinc finger, CCHC-type domain containing protein.	uncharacterized TF
FL478	Os07t0192300-01	Heat shock protein DnaJ, N-terminal domain containing protein.	OsDjC58/NAL11; involved in stress protection for proteins (?), localized in mitochondria, NAL11 was observed to lead to narrow leaves, shorter panicles, thin and slender stems when recessive
FL478	Os04t0604500-00	Similar to OSIGBa0118P15.9 protein.
FL478	Os03t0349000-01	Nucleoporin interacting component family protein.	mRNA export or protein import to the nucleus
FL478	Os01t0649100-02	Malate dehydrogenase.	OsmMDH; mitochondrial part of the Krebs cycle
FL478	Os12t0271600-01	Similar to Myosin heavy chain-like.	BIP134; may be interacting with brassinosteroid receptor kinase (BRI1)
FL478	Os11t0557500-00	Protein kinase, core domain containing protein.	OsLYK6/OsLysM-RLK7; signal transduction pathway
FL478	Os10t0478400-00	Conserved hypothetical protein.	possible membrane protein
FL478	Os10t0183500-01	Conserved hypothetical protein.
FL478	Os07t0274800-02	Similar to Protein phosphatase 2A B' regulatory subunit.	serine/threonine protein phosphatase 2a regulatory subunit; involved in signal transduction; protein dephosphorylation and regulation of autophosphorylation
FL478	Os07t0177300-01	Uncharacterised protein family UPF0005 domain containing protein.	possible membrane protein
FL478	Os04t0533900-01	Heavy metal transport/detoxification protein domain containing protein.	involved in metal ion transport; domain is 'ferrodoxin-like'
FL478	Os01t0287600-01	Similar to Chitinase 10.	Cht10; possible involvement in cell wall; cell wall macromolecular catabolic process
FL478	Os03t0363900-02	Zinc finger, DHHC-type domain containing protein.	s-acyltransferase; for protein targeting to membrane; localized in golgi and er, helps in protein modification by palmitoylation
FL478	Os09t0363600-01	WD40/YVTN repeat-like domain containing protein.	OsWD40-171;
FL478	Os08t0271400-01	Hypothetical protein.
FL478	Os07t0124500-01	Similar to Eukaryotic translation initiation factor 3 subunit 8 (eIF3 p110) (eIF3c).	translational initiation
FL478	Os01t0253600-01	Replication factor A protein 3 domain containing protein.	OsRPA14; important for DNA metabolism, recombination, repair, or replication; prevents DNA reannealing and recruits different proteins involved in DNA metabolism
FL478	Os09t0518700-01	Inositol 1, 3, 4-trisphosphate 56-kinase family protein.	ITPK6; inositol tetrakisphosphate 1-kinase 6; phosphorylates inositol polyphosphates; possibly involved in phosphate loading or signaling
FL478	Os05t0214232-00	Hypothetical protein.
FL478	Os12t0571200-01	Similar to Mitochondrial import inner membrane translocase subunit Tim9.	TIM9; chaperone for proteins coming to mitochondria
FL478	Os10t0190000-02	Similar to Ubiquitin carrier protein.	OsUBC4; involved in protein neddylation (similar to ubiquitin but not ubiquitin); prevents normal target protein interactions inhibiting activity
FL478	Os08t0441600-01	Similar to Chorismate mutase CM2 (EC 5.4.99.5) (Chorimate mutase).	involved in shikimate pathway for production of aromatic amino acids
FL478	Os05t0554000-01	Similar to cDNA clone:001-123-D07, full insert sequence.	OsMATE2; involved in trafficking substances to the cell; modulates arsenate accumulation; negative regulator of resistance; increases oxidative stress in overexpression lines of arabidopsis
FL478	Os03t0205150-01	Hypothetical conserved gene.
FL478	Os01t0811100-02	Proteasome subunit alpha type 3 (EC 3.4.25.1) (20S proteasome alpha subunit G) (20S proteasome subunit alpha-7).	PAG1; proteasome subunit, involved in degradation of proteins through ubiquitination
FL478	Os01t0178500-02	A member of rice Aux/IAA family, Cross-talk of auxin and brassinosteroid signaling pathways, Plant morphogenesis	OsIAA1; involved in auxin signaling as an inhibitor of ARFs and are degraded when auxin comes
FL478	Os01t0363300-01	Uncharacterised protein family UPF0497, trans-membrane plant subgroup domain containing protein.	CASP-like protien 1E1; plasma membrane localized; possibly for metal ion transport
FL478	Os10t0170501-00	Conserved hypothetical protein.	possible membrane protein
FL478	Os04t0618500-01	Similar to Gamma-SNAP (Fragment).	involved in intracellular protein transport (protein processing ?)
FL478	Os03t0839000-01	Zinc finger, RING/FYVE/PHD-type domain containing protein.	ubiquitin ligase activity
FL478	Os03t0356700-01	Villin, villin/gelsolin superfamily protein, Actin binding protein, Regulation of plant architecture	VLN2; important for plant architecture thr
FL478	Os03t0331700-02	Similar to cDNA clone:002-120-A09, full insert sequence.	cml27
FL478	Os03t0253500-00	D111/G-patch domain containing protein.	G-patch domain protein, domain is for binding RNA for processing
FL478	Os01t0273800-01	FAD-dependent pyridine nucleotide-disulphide oxidoreductase domain containing protein.	YUCCA9; modulation of this gene along with YUCCA8 is important for auxin homeostasis, and it has links with JA signaling; also has link to ethylene signaling
FL478	Os01t0260700-01	Similar to PUR ALPHA-1.	has transcriptional repressor domains; also has DNA or RNA binding domains; purine-rich negative regulatory element binding
FL478	Os01t0209000-02	Alg9-like mannosyltransferase family protein.	included in the ER processing pathway, possibly for protein modification for degradation
FL478	Os01t0174300-02	Flavoprotein pyridine nucleotide cytochrome reductase domain containing protein.	NADH-cytochrome b5 reductase; implicated in response to stress; may be localized in golgi, mt, or cell wall;
FL478	Os01t0195500-01	Translation initiation factor SUI1 domain containing protein.	mrna binding for translation initiation/ formation of translation preintiation complex
FL454	Os05t0154900-01	Conserved hypothetical protein.	OsMed28_1; localized in nucleus with mediator complex that regulates transcription; part of the complex that recognizes TFs
FL454	Os05t0305900-01	Protein kinase, core domain containing protein.	membrane bound protein kinase, may be for signaling
FL454	Os03t0331700-02	Similar to cDNA clone:002-120-A09, full insert sequence.	cml27
FL454	Os07t0560300-01	Armadillo-like helical domain containing protein.
FL454	Os04t0465000-01	Sterile alpha motif SAM domain containing protein.	possible phospholipase activity
FL454	Os02t0528000-00	Zinc finger, RING-type domain containing protein.	ubiqutin ligase activity
FL454	Os10t0508100-01	Protein of unknown function DUF641, plant domain containing protein.	localized in cytoplasm or peroxisome; may be involved in negative gravitropism or response to red/far red light
FL454	Os10t0358150-01	Conserved hypothetical protein.
FL454	Os03t0337900-01	Similar to predicted protein.	fumarate hydratase 1, mitochondrial; involved in TCA cycle, converting fumarate to malate
FL454	Os07t0668500-00	Protein kinase, catalytic domain domain containing protein.	membrane bound protein kinase, may be for signaling
FL454	Os10t0340100-02	Conserved hypothetical protein.
FL454	Os08t0555200-01	Nonaspanin (TM9SF) family protein.	transmembrane 9 superfamily member; may act as a transporter for small molecules to and fro the plasma membrane
FL454	Os08t0434700-01	Homeodomain-like containing protein.	uncharacterized TF
FL454	Os02t0299600-01	Protein of unknown function DUF1242 family protein.	protein kish; may be invovled in intracellular transport or protein secretion
FL454	Os07t0542600-01	Similar to receptor-like protein kinase RK20-1.	membrane bound protein kinase; duf26 kinase gene; similar gene (OsDUF26) is involved in defense against pathogens and other possible ca2+ genes
FL454	Os06t0305200-01	Nucleoporin, non-repetitive/WGA-negative domain containing protein.	protein import to the nucleus
FL454	Os02t0819100-01	DHHC-type zinc finger protein, Regulation of plant architecture by altering the tiller	OsDHHC1; overexpression of this gene resulted in increased tillering; possible involvement in protein modification for targeting proteins to membranes through palmitoylation
FL454	Os09t0281700-01	Similar to Ras-related protein RGP1 (GTP-binding regulatory protein RGP1).	RGP1; involved in cell wall synthesis; involved in intracellular protein transport and mediates Rab protein signal transduction
FL454	Os01t0725400-01	Uncharacterised protein family UPF0497, trans-membrane plant subgroup domain containing protein.	CASP-like protein 3A1; membrane bound protein possibly for metal ion transport
FL454	Os12t0149000-01	Protein of unknown function DUF868, plant domain containing protein.
FL454	Os08t0504700-01	Gibberellin-induced A20/AN1 zinc-finger protein, Negative regulation of GA (gibberellin) -mediated cell elongation	OsDOG/OsSAP11; constitutive expression showed dwarf phenotype because of deficiency of cell elongation; stress-inducible expression helped with mitigating yield loss
FL454	Os02t0150100-02	Similar to DEAD-box protein abstrakt.	OsRH35; similar genes such as OsRH34 and 36 seem to be involved in stress mitigation;
FL454	Os07t0602600-01	Similar to RNA binding protein.	mitochondrial RNA modification
FL454	Os11t0225100-01	Nucleotide binding site-leucine rich repeats (NBS-LRRs) protein, Resistance to the blast fungus, (Nippponbare: susceptible to the blast fungus carrying the AVR-Pia)	OsRGA4; for recognition of Magnaporthe oryzae effectors
FL454	Os03t0701700-02	Similar to Ethylene receptor.	Os-ERS1; ethylene response sensor 1; acts as redundant negative regulator of ethylene signaling
FL454	Os02t0833300-01	Ubiquitin-conjugating enzyme/RWD-like domain containing protein.	may be involved in protein transport via modification or addition of residues
FL454	Os11t0157400-01	Exo70 exocyst complex subunit family protein.	Exo70A3; exocytsis protein; similar protein exo70a1 disruption affects mineral nutrient assimilation
FL454	Os09t0451700-00	Protein of unknown function DUF573 family protein.	uncharacterized TF
FL454	Os07t0122350-00	Hypothetical genes.
FL454	Os05t0102000-01	SAM dependent carboxyl methyltransferase family protein.	OsJMT1; converts JA to methyl JA
FL454	Os12t0168100-01	Similar to AP2 domain containing protein RAP2.6 (Fragment).	OsERF124; uncharacterized ERF; but was observed to be upregulated under stress
FL454	Os03t0808600-01	Similar to Calcium-dependent protein kinase.	CPK8; activated by Ca2+ and plays a role in signal transduction pathway initiated by Ca
FL454	Os01t0830700-02	Protein of unknown function DUF231, plant domain containing protein.	OsTBL12; trichome birefringence-like 12; Xylan O-acetyltransferase 1; possible localization in golgi, so may be involved in export of substances?
FL454	Os06t0552400-02	Zinc finger, RING/FYVE/PHD-type domain containing protein.	LAs17 binding protein like; may be involved In plasma membrane plasticity (ruffle assembly)
FL454	Os02t0676000-01	Membrane bound O-acyl transferase, MBOAT family protein.
FL454	Os08t0436100-01	Nucleoside phosphatase GDA1/CD39 family protein.	has homology to arabidopsis apyrase, which denatures ATP to AMP and releases 2 Pi's
FL454	Os03t0197100-01	Similar to Sugar transporter protein.	possible mannitol transporter; carbohydrate:proton symporter
FL454	Os04t0486300-01	Protein of unknown function DUF295 family protein.
FL454	Os06t0220900-00	Conserved hypothetical protein.
FL454	Os08t0109800-01	Regulator of chromosome condensation/beta-lactamase-inhibitor protein II domain containing protein.	OsCRR2; related to Crinkly4 receptor like kinase, which is important for cell differentiation in palea and lemma development
FL454	Os02t0656200-01	Similar to Ceramide kinase.	OsCERK; inhibition of CERK leads to apoptosis in protoplasts, as ceramide-1-phosphate helps in cell survival and for the cell to proliferate
FL454	Os10t0542200-01	Ubiquilin domain containing protein.	ubq family protein
FL454	Os03t0232800-02	Similar to Lecithin:cholesterol acyltransferase family protein, expressed.	lecithin-cholesterol acyltransferase like 1; processes cholesterol and lipids to make them more hydrophobic (?) may be for transporting things out
FL454	Os01t0812050-00	Conserved hypothetical protein.
FL454	Os06t0137650-00	UDP-glucuronosyl/UDP-glucosyltransferase domain containing protein.
FL454	Os01t0660100-01	Conserved hypothetical protein.
FL454	Os04t0376400-01	Glycoside hydrolase, family 18, catalytic domain domain containing protein.	chitinase activity; carbohydrate metabolic process involved
FL454	Os02t0667500-01	Similar to tetracycline transporter protein.	transmembrane transporter protein
FL454	Os11t0149200-00	Conserved hypothetical protein.	negative regulation of transcription; possible repressor
FL454	Os01t0856800-01	Similar to pleckstrin homology domain-containing protein 1.	may be involved in intracellular signaling or as a cytoskeleton component
FL454	Os12t0581600-01	Similar to Integral membrane protein.	OsNRAMP7; family of ion transporters
FL454	Os08t0152600-01	Protein of unknown function DUF1336 domain containing protein.
FL454	Os10t0486000-01	Metal-dependent phosphohydrolase, HD region domain containing protein.	OsCYP86A7-3
FL454	Os03t0111400-01	Heavy metal transport/detoxification protein domain containing protein.
FL454	Os03t0157900-01	Phosphoserine aminotransferase, chloroplast precursor (EC 2.6.1.52) (PSAT).	serine synthesis; involved in N loading
FL454	Os02t0120200-01	Similar to Phospholipase D nu-2 (Fragment).	PLDkappa; phospholipid biosynthesis
FL454	Os05t0493166-00	Hypothetical protein.
FL454	Os09t0553800-01	Conserved hypothetical protein.
FL454	Os11t0148200-01	Similar to predicted protein.	OsTBL22; O-acyltransferase; possible localization in golgi
FL454	Os01t0760600-04	Similar to Aspartate aminotransferase.	aspartate aminotransferase; helps cycle aKG, aspartate, glutamate, oxaloacetate
FL454	Os03t0803200-01	Similar to CLE family OsCLE306 protein.	involved in cell to cell signaling
FL454	Os04t0556600-01	cis-Zeatin-O-glucosyltransferase, Catalyze O-glucosylation of cZ and cZ-riboside	OscZOGT2; cytokinin biosynthesis; overexpression lines led to delay of senescence, short shoot and reduced root phenotype
FL454	Os01t0369700-03	Similar to Glutathione S-transferase GST 8 (EC 2.5.1.18).	OsGSTF5; for ros salvage possibly
FL454	Os01t0784800-01	Flavodoxin/nitric oxide synthase domain containing protein.	may be for creating signals (No2) acts a signaling molecule
FL454	Os02t0556600-01	Similar to Pherophorin-dz1 protein precursor.
FL454	Os07t0684900-01	WUSCHEL-related homeobox protein, Transcription factor, Crown root development	WOX11; development of plant organs, works with cytokinin and auxin signaling to form roots
FL454	Os03t0751000-01	Protein of unknown function DUF423 family protein.	membrane bound protein
FL454	Os03t0787150-00	Hypothetical gene.
FL454	Os09t0440700-02	Ctr copper transporter family protein.	OsCOPT7/COPT5.1; copper transporter
FL454	Os01t0686500-01	Protein of unknown function DUF1618 domain containing protein.
FL454	Os10t0377400-02	Similar to Ras-related protein Rab11D.	OsRab11E1; Rab proteins are known to be involved in signaling; Rab11 was shown to be required for JA signaling
FL454	Os08t0529100-01	Similar to Proteasome subunit beta type 1 (EC 3.4.25.1) (20S proteasome alpha subunit F) (20S proteasome subunit beta-6).	proteasome subunit for degradation through ubiquitin dependent mechanism
FL454	Os01t0806600-01	Conserved hypothetical protein.
FL454	Os05t0312201-01	Hypothetical gene.
FL454	Os01t0758000-00	Similar to copper-binding family protein.	copper binding; possibly metal ion transport similar to ferrodoxin
FL454	Os09t0466300-01	Similar to FIP1.	FIP1 is a protein for pre-mrna poly adenylation
FL454	Os07t0512100-01	Similar to protein binding protein.	ankyrin domain containing
FL454	Os10t0388900-01	Conserved hypothetical protein.
FL454	Os04t0571300-03	Cyclin-like F-box domain containing protein.	OsFBOX228
FL454	Os02t0317700-01	Conserved hypothetical protein.
FL454	Os11t0127700-01	Conserved hypothetical protein.	has signal peptide, possibly exported
FL454	Os08t0375900-02	Similar to Nudix hydrolase 22, chloroplast precursor (EC 3.6.1.-) (AtNUDT22).	may be involved with hydrolysis of nucleoside diphosphate derivatives
FL454	Os07t0605400-02	Similar to EGG APPARATUS-1 protein (ZmEA1).	EA1 is involved in micropylar tube formation
FL454	Os02t0694201-01	Acyl-CoA N-acyltransferase domain containing protein.	possible histone h3 and h4 acetylation activity; annotation shows it in the golgi apparatus
FL454	Os06t0682300-01	Conserved hypothetical protein.	membrane localized protein
FL454	Os01t0525800-01	Similar to DVL5.	homologs in arabidopsis were suggested as negative regulators of cell proliferation and as positional cues along longitudinal axis of the body; DVL5 or RTFL15
FL454	Os01t0142800-03	Similar to Peptide transporter.	OsPTR7/OsNPF8.1; transmembrane transporter; observed to be involved in accumulation of dimethylarsenate accumulation in grains
FL454	Os04t0600200-01	Homodimeric diiron-carboxylate protein, Cyanide-resistant respiration in mitochondria, Reactive oxygen species (ROS) scavenging	AOX1A; alternative oxidase, provides alternate route for electron transport chain that is resistant to cyanide, during stress conditions (cold) but provides less atp's
FL454	Os04t0443000-01	FAR1 domain containing protein.	may be an uncharacterized TF; FAR1 is a TF that is involved in phytochrome signaling; far red inhibited reaction
FL454	Os07t0584000-01	Similar to Yippee-like protein CG15309.	has zn binding domain; may be involved in mitotic processes, as said by domain descritpion
FL454	Os03t0691800-01	Similar to HIPL1 protein precursor.	possibly hedgehog-interacting protein-like; may be involved in cell differentiation; but also seems enzymatic
FL454	Os01t0197700-01	Cytokinin oxidase/dehydrogenase, Regulation of grain production	Gn11a/OsCKX2; cytokinin dehydrogenase, modulates cytokinin levels; reduced expression leads to more cytokinin and more reproductive organs and yield
FL454	Os05t0543100-01	Similar to Clathrin coat assembly protein AP47 (Clathrin coat associated protein AP47) (Golgi adaptor AP-1 47 kDa protein) (HA1 47 kDa subunit) (Clathrin assembly protein assembly protein complex 1 medium chain) (Uncoordinated protein 101).	vesicle mediated transport; intracellular protein transports
FL454	Os06t0520600-01	Similar to Zinc finger CCCH type domain containing protein ZFN-like 1.	OsC3H43; transcription factor but not yet characterized for function
FL454	Os11t0120300-01	Protein of unknown function DUF567 family protein.	eukaryotic translation initiation factor 2b family protein
FL454	Os08t0395300-01	Similar to AP-4 complex subunit sigma-1.	intracellular protein transport, possibly through lysosome vesicle biogenesis
